# Supplementary material
Source: Springer Nature journal article supplement (https://www.springermedizin.de/resource/supplementary/12967_2007_182_MOESM1_ESM.pdf/9575878)

**A**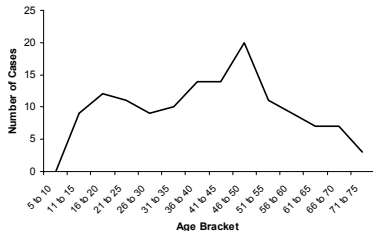**B**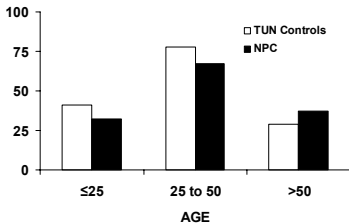**C**

|       | Control  |          |           | NPC      |          |           |
|-------|----------|----------|-----------|----------|----------|-----------|
|       | Total(%) | Male(%)  | Female(%) | Total(%) | Male(%)  | Female(%) |
| ≤25   | 41       | 30(0.73) | 11(0.27)  | 32       | 17(0.53) | 15(0.47)  |
| 25-50 | 78       | 53(0.68) | 25(0.32)  | 67       | 48(0.72) | 19(0.28)  |
| ≥50   | 29       | 20(0.69) | 9(0.31)   | 37       | 27(0.73) | 10(0.27)  |
| Total | 148      | 103      | 45        | 136      | 92       | 44        |

Supplement: MOESM1 [file 9575878]
